# Supplementary material for: GPU Implementation of the Improved CEEMDAN Algorithm for Fast and Efficient EEG Time–Frequency Analysis
Source: MDPI journal article supplement (doi:10.3390/s23208654), 2023-10-23
Supplement: s1 [file s1]

**Table S1.** Device variables used in our GPU implementation, their size and kernels in which they are referenced

| Variable name                                      | Dimensions                                         | Used in kernel function                                                                                                  |
|----------------------------------------------------|----------------------------------------------------|--------------------------------------------------------------------------------------------------------------------------|
| d_current                                          | SignalLength $\times$ NumNoise                     | findExtremaShfl(), selectExtrema(),<br>updateRealizations()                                                              |
| d_noisedSignal                                     |                                                    | produceFirstIMF()<br>addNoise()                                                                                          |
| d_whiteNoise                                       |                                                    | curandGenerateNormal(), addNoise()                                                                                       |
| d_whiteNoiseModes                                  | SignalLength $\times$ NumNoise<br>$\times$ NumIMFs | addNoise(), updateRealizations(),<br>updateSignal()                                                                      |
| d_channelMeans                                     | NumNoise                                           | mean(), multiply()                                                                                                       |
| d_channelVariance                                  | NumNoise                                           | variance(), multiply(), addNoise()                                                                                       |
| d_sparseFlag                                       | SignalLength $\times$ NumNoise                     | findExtremaShfl(), DeviceScanInitKernel(),<br>DeviceScanKernel(), selectExtrema()                                        |
| d_noisedSignalIndex                                | SignalLength $\times$ NumNoise                     | findExtremaShfl(),selectExtrema(), interpolate()                                                                         |
| d_ScanResult                                       | SignalLength $\times$ NumNoise                     | scanLargeDeviceArray(),<br>scanSmallDeviceArray(), selectExtrema()                                                       |
| d_compactValue<br>d_compactIndex/                  | SignalLength $\times$ NumNoise                     | selectExtrema(), setBoundary(),<br>tridiagonalSetup(), splineCoefficients(),<br>interpolate()                            |
| d_num_extrema_max/<br>d_num_extrema_min            | NumNoise                                           | selectExtrema(), tridiagonalSetup(),<br>splineCoefficients(), interpolate(),<br>averageUppperLower(), siftingCriterion() |
| d_upperDia<br>d_middleDia<br>d_lowerDia<br>d_right | SignalLength $\times$ NumNoise                     | preSetTridiagonalMatrix(), tridiagonalSetup()<br>cusparseSgtsv2(), splineCoefficients(),<br>interpolate()                |
| d_meanEnvelope                                     |                                                    | averageUppperLower(), updateRealizations()                                                                               |
| d_envelopeVauleMax/<br>d_envelopeVauleMin          |                                                    | averageUppperLower(), interpolate(),<br>produceSX()                                                                      |
| d_residue                                          |                                                    | produceResidue(), averageUpdateSignal()                                                                                  |
| d_forNext                                          | SignalLength                                       | averageUpdateSignal(), produceFirstIMF(),<br>addNoise()                                                                  |
| d_running                                          | SignalLength                                       | produceFirstIMF()                                                                                                        |
| d_IMFs                                             | SignalLength $\times$ NumIMFs                      | averageUpdateSignal(), produceFirstIMF()                                                                                 |

**Table S2.** Speedup values for different test configurations (V100 vs MATLAB).

| Number<br>of Sifting<br>Iterations | Signal<br>Length | Number of realizations |       |       |       |       |
|------------------------------------|------------------|------------------------|-------|-------|-------|-------|
|                                    |                  | 500                    | 400   | 300   | 200   | 100   |
| 10                                 | 10241            | 22.9                   | 18.4  | 18.7  | 18.5  | 18.1  |
|                                    | 20481            | 40.4                   | 33.7  | 32.9  | 31.8  | 31.0  |
|                                    | 30721            | 46.5                   | 48.7  | 48.4  | 46.0  | 46.2  |
|                                    | 40961            | 62.4                   | 65.2  | 64.4  | 64.4  | 60.3  |
|                                    | 51201            | 82.2                   | 113.5 | 86.2  | 83.4  | 84.7  |
|                                    | 61441            | 96.8                   | 100.5 | 102.1 | 102.6 | 98.6  |
|                                    | 71681            | 118.7                  | 122.0 | 117.6 | 117.7 | 116.8 |
|                                    | 81921            | 162.4                  | 151.1 | 151.0 | 150.7 | 142.8 |
|                                    | 92161            | 194.6                  | 169.8 | 181.1 | 166.9 | 161.3 |
|                                    | 102401           | 265.2                  | 215.7 | 190.5 | 207.7 | 196.1 |
| 20                                 | 10241            | 15.9                   | 11.9  | 11.9  | 11.9  | 11.1  |
|                                    | 20481            | 27.5                   | 19.9  | 19.5  | 19.9  | 18.5  |
|                                    | 30721            | 31.3                   | 29.2  | 28.9  | 29.1  | 27.9  |
|                                    | 40961            | 41.2                   | 39.1  | 36.9  | 37.3  | 35.6  |
|                                    | 51201            | 53.3                   | 50.3  | 49.3  | 47.8  | 48.1  |
|                                    | 61441            | 62.4                   | 58.6  | 57.4  | 56.6  | 53.8  |
|                                    | 71681            | 77.5                   | 65.7  | 66.7  | 67.4  | 63.5  |
|                                    | 81921            | 97.9                   | 90.8  | 81.5  | 81.3  | 77.5  |
|                                    | 92161            | 113.5                  | 92.8  | 92.9  | 102.7 | 90.0  |
|                                    | 102401           | 129.2                  | 111.2 | 124.7 | 106.8 | 105.4 |
| 50                                 | 10241            | 7.3                    | 6.6   | 6.4   | 6.5   | 7.0   |
|                                    | 20481            | 15.0                   | 11.5  | 11.1  | 11.0  | 12.3  |
|                                    | 30721            | 17.9                   | 17.7  | 17.8  | 17.2  | 16.4  |
|                                    | 40961            | 23.4                   | 22.4  | 22.9  | 21.0  | 22.2  |
|                                    | 51201            | 31.2                   | 30.0  | 30.7  | 30.4  | 28.5  |
|                                    | 61441            | 33.6                   | 32.4  | 34.7  | 32.6  | 31.5  |
|                                    | 71681            | 34.5                   | 37.8  | 36.4  | 35.3  | 37.0  |
|                                    | 81921            | 49.3                   | 46.0  | 46.1  | 44.2  | 43.3  |
|                                    | 92161            | 54.9                   | 53.8  | 47.4  | 51.1  | 49.4  |
|                                    | 102401           | 63.6                   | 66.2  | 64.6  | 54.8  | 53.4  |
